# Supplementary material for: Euphorbia tirucalli modulates gene expression in larynx squamous cell carcinoma
Source: BMC Complement Altern Med. 2016 May 21;16:136. doi: 10.1186/s12906-016-1115-z (PMC4875670; doi:10.1186/s12906-016-1115-z)
Supplement: Additional file 3: — Excel spreadsheet about Figure 1D – raw data on cell count. (XLS 23 kb) [file 12906_2016_1115_MOESM3_ESM.xls]

## Sheet: Plan1
Figura 1C
	conc1 - 0,25µg/mL	conc2 - 2,5µg/mL	conc3 - 25µg/mL	conc4 - 250µg/mL	controle
Dia 1	97,98,99	53, 54, 55	5, 6, 7	2, 2, 2	399, 400, 400
Dia 3	299,300,301	149, 150, 151	55, 56, 57	2, 3, 3	489, 491, 491
Dia 5	499, 500, 501	299, 300, 301	239, 240, 241	5, 5,5	599, 600, 601
Dia 7	369, 370, 371	209, 210, 211	139, 140, 141	4, 5, 5	390, 390, 389
Figura 1D
	controle	C + et	aveloz 25ug/mL
Dia 1	39, 40, 41	39, 40, 41	29, 30, 31
Dia 3	59, 60, 61	59, 60, 61	39, 40, 41
Dia 5	24, 24, 23	18, 19, 19	9, 10, 10
Dia 7	29, 30, 31	21, 22, 22	5, 5, 5
