# Supplementary material for: Euphorbia tirucalli modulates gene expression in larynx squamous cell carcinoma
Source: BMC Complement Altern Med. 2016 May 21;16:136. doi: 10.1186/s12906-016-1115-z (PMC4875670; doi:10.1186/s12906-016-1115-z)
Supplement: Additional file 4: — Excel spreadsheet about Figure 3 – raw data on quantitative PCR. (XLS 74 kb) [file 12906_2016_1115_MOESM4_ESM.xls]

## Sheet: Results
Block Type	96fast
Chemistry	SYBR_GREEN
Experiment File Name	D:\Applied Biosystems\SDS Documents\Bianca\Flavia\Gabriela2.eds
Experiment Run End Time	2013-07-24 18:17:14 PM BRT
Instrument Type	sds7500fast
Passive Reference	ROX
Well	Sample Name	Target Name	Task	Reporter	Quencher	RQ	RQ Min	RQ Max	Cт	Cт Mean	Cт SD	ΔCт	ΔCт Mean	ΔCт SE	HK Control ΔCт Mean	HK Control ΔCт SE	ΔΔCт	Automatic Ct Threshold	Ct Threshold	Automatic Baseline	Baseline Start	Baseline End	Efficiency	Tm1	Tm2	Tm3	Comments	AMPNC	MTP
A1	Aveloz	ANXA1	UNKNOWN	SYBR	None	2.60708	2.4135	2.81619	18.5314	18.5139	0.0446581		1.19451	0.0400901			-1.38243	FALSE	0.071608	TRUE	3	15	1	76.3178	70.7555			N	Y
A2	Aveloz	ANXA1	UNKNOWN	SYBR	None	2.60708	2.4135	2.81619	18.5472	18.5139	0.0446581		1.19451	0.0400901			-1.38243	FALSE	0.071608	TRUE	3	15	1	76.3178	70.7555			N	Y
A3	Aveloz	ANXA1	UNKNOWN	SYBR	None	2.60708	2.4135	2.81619	18.4631	18.5139	0.0446581		1.19451	0.0400901			-1.38243	FALSE	0.071608	TRUE	3	15	1	76.4916	70.7555			N	Y
A4	Controle	ANXA1	UNKNOWN	SYBR	None	1	0.969823	1.03112	18.5989	18.5816	0.0183931		2.57694	0.0159222			0	FALSE	0.071608	TRUE	3	15	1	76.6654	70.9293			N	Y
A5	Controle	ANXA1	UNKNOWN	SYBR	None	1	0.969823	1.03112	18.5623	18.5816	0.0183931		2.57694	0.0159222			0	FALSE	0.071608	TRUE	3	15	1	76.6654	70.9293			N	Y
A6	Controle	ANXA1	UNKNOWN	SYBR	None	1	0.969823	1.03112	18.5834	18.5816	0.0183931		2.57694	0.0159222			0	FALSE	0.071608	TRUE	3	15	1	76.8393	71.1031			N	Y
A7	Etanol	ANXA1	UNKNOWN	SYBR	None	1.20925	1.13295	1.29069	18.5029	18.5096	0.00841647		2.30283	0.0338682			-0.274113	FALSE	0.071608	TRUE	3	15	1	76.8393	71.1031			N	Y
A8	Etanol	ANXA1	UNKNOWN	SYBR	None	1.20925	1.13295	1.29069	18.519	18.5096	0.00841647		2.30283	0.0338682			-0.274113	FALSE	0.071608	TRUE	3	15	1	76.6654	70.9293			N	Y
A9	Etanol	ANXA1	UNKNOWN	SYBR	None	1.20925	1.13295	1.29069	18.5067	18.5096	0.00841647		2.30283	0.0338682			-0.274113	FALSE	0.071608	TRUE	3	15	1	76.6654	71.1031			N	Y
A12		ANXA1	NTC	SYBR	None				19.6311									FALSE	0.071608	TRUE	3	16	1	70.9293				Y	N
B1	Aveloz	NGFRAP1	UNKNOWN	SYBR	None	1.75088	1.57179	1.95037	18.5565	18.5327	0.0812616		1.21334	0.0560677			-0.808081	FALSE	0.071608	TRUE	3	16	1	73.5366				N	N
B2	Aveloz	NGFRAP1	UNKNOWN	SYBR	None	1.75088	1.57179	1.95037	18.5994	18.5327	0.0812616		1.21334	0.0560677			-0.808081	FALSE	0.071608	TRUE	3	15	1	73.7105				N	N
B3	Aveloz	NGFRAP1	UNKNOWN	SYBR	None	1.75088	1.57179	1.95037	18.4422	18.5327	0.0812616		1.21334	0.0560677			-0.808081	FALSE	0.071608	TRUE	3	15	1	73.7105				N	N
B4	Controle	NGFRAP1	UNKNOWN	SYBR	None	1	0.937704	1.06643	18.0873	18.026	0.0541193		2.02142	0.0334223			0	FALSE	0.071608	TRUE	3	15	1	73.8843				N	N
B5	Controle	NGFRAP1	UNKNOWN	SYBR	None	1	0.937704	1.06643	18.0063	18.026	0.0541193		2.02142	0.0334223			0	FALSE	0.071608	TRUE	3	15	1	74.0581				N	N
B6	Controle	NGFRAP1	UNKNOWN	SYBR	None	1	0.937704	1.06643	17.9846	18.026	0.0541193		2.02142	0.0334223			0	FALSE	0.071608	TRUE	3	15	1	74.0581				N	N
B7	Etanol	NGFRAP1	UNKNOWN	SYBR	None	0.974929	0.885516	1.07337	18.2718	18.2648	0.0642266		2.05805	0.0499846			0.0366306	FALSE	0.071608	TRUE	3	15	1	73.8843				N	N
B8	Etanol	NGFRAP1	UNKNOWN	SYBR	None	0.974929	0.885516	1.07337	18.1973	18.2648	0.0642266		2.05805	0.0499846			0.0366306	FALSE	0.071608	TRUE	3	15	1	74.0581				N	N
B9	Etanol	NGFRAP1	UNKNOWN	SYBR	None	0.974929	0.885516	1.07337	18.3252	18.2648	0.0642266		2.05805	0.0499846			0.0366306	FALSE	0.071608	TRUE	3	15	1	74.0581				N	N
B12		NGFRAP1	NTC	SYBR	None				18.5787									FALSE	0.071608	TRUE	3	16	1	73.3628	65.7147			Y	Y
C1	Aveloz	CD55	UNKNOWN	SYBR	None	3.26599	3.01778	3.5346	15.9136	15.8594	0.0472543		-1.45996	0.0410702			-1.70752	FALSE	0.071608	TRUE	3	12	1	72.8414				N	N
C2	Aveloz	CD55	UNKNOWN	SYBR	None	3.26599	3.01778	3.5346	15.8383	15.8594	0.0472543		-1.45996	0.0410702			-1.70752	FALSE	0.071608	TRUE	3	12	1	73.189				N	N
C3	Aveloz	CD55	UNKNOWN	SYBR	None	3.26599	3.01778	3.5346	15.8265	15.8594	0.0472543		-1.45996	0.0410702			-1.70752	FALSE	0.071608	TRUE	3	12	1	73.3628				N	N
C4	Controle	CD55	UNKNOWN	SYBR	None	1	0.946986	1.05598	16.2973	16.2522	0.0445101		0.247563	0.0283042			0	FALSE	0.071608	TRUE	3	13	1	73.5366				N	N
C5	Controle	CD55	UNKNOWN	SYBR	None	1	0.946986	1.05598	16.251	16.2522	0.0445101		0.247563	0.0283042			0	FALSE	0.071608	TRUE	3	12	1	73.3628				N	N
C6	Controle	CD55	UNKNOWN	SYBR	None	1	0.946986	1.05598	16.2083	16.2522	0.0445101		0.247563	0.0283042			0	FALSE	0.071608	TRUE	3	12	1	73.5366				N	N
C7	Etanol	CD55	UNKNOWN	SYBR	None	1.2006	1.11381	1.29416	16.151	16.1905	0.0345006		-0.0161966	0.0389898			-0.26376	FALSE	0.071608	TRUE	3	12	1	73.3628				N	N
C8	Etanol	CD55	UNKNOWN	SYBR	None	1.2006	1.11381	1.29416	16.206	16.1905	0.0345006		-0.0161966	0.0389898			-0.26376	FALSE	0.071608	TRUE	3	12	1	73.5366				N	N
C9	Etanol	CD55	UNKNOWN	SYBR	None	1.2006	1.11381	1.29416	16.2146	16.1905	0.0345006		-0.0161966	0.0389898			-0.26376	FALSE	0.071608	TRUE	3	12	1	73.5366				N	N
C12		CD55	NTC	SYBR	None				Undetermined									FALSE	0.071608	TRUE	3	35	1	75.101				N	N
D1	Aveloz	ITPR1	UNKNOWN	SYBR	None	0.220649	0.203372	0.239392	26.098	26.1351	0.0505699		8.81573	0.042366			2.18018	FALSE	0.071608	TRUE	3	22	1	78.2298				N	N
D2	Aveloz	ITPR1	UNKNOWN	SYBR	None	0.220649	0.203372	0.239392	26.1927	26.1351	0.0505699		8.81573	0.042366			2.18018	FALSE	0.071608	TRUE	3	22	1	78.7513				N	N
D3	Aveloz	ITPR1	UNKNOWN	SYBR	None	0.220649	0.203372	0.239392	26.1146	26.1351	0.0505699		8.81573	0.042366			2.18018	FALSE	0.071608	TRUE	3	23	1	78.7513				N	N
D4	Controle	ITPR1	UNKNOWN	SYBR	None	1	0.878739	1.13799	22.5509	22.6402	0.114512		6.63556	0.0671695			0	FALSE	0.071608	TRUE	3	19	1	78.9251				N	N
D5	Controle	ITPR1	UNKNOWN	SYBR	None	1	0.878739	1.13799	22.6004	22.6402	0.114512		6.63556	0.0671695			0	FALSE	0.071608	TRUE	3	19	1	78.7513				N	N
D6	Controle	ITPR1	UNKNOWN	SYBR	None	1	0.878739	1.13799	22.7693	22.6402	0.114512		6.63556	0.0671695			0	FALSE	0.071608	TRUE	3	19	1	78.7513				N	N
D7	Etanol	ITPR1	UNKNOWN	SYBR	None	0.758119	0.693352	0.828937	23.2121	23.2418	0.0555835		7.03506	0.0464035			0.399503	FALSE	0.071608	TRUE	3	19	1	78.7513				N	N
D8	Etanol	ITPR1	UNKNOWN	SYBR	None	0.758119	0.693352	0.828937	23.3059	23.2418	0.0555835		7.03506	0.0464035			0.399503	FALSE	0.071608	TRUE	3	19	1	78.9251				N	N
D9	Etanol	ITPR1	UNKNOWN	SYBR	None	0.758119	0.693352	0.828937	23.2074	23.2418	0.0555835		7.03506	0.0464035			0.399503	FALSE	0.071608	TRUE	3	20	1	79.099				N	N
D12		ITPR1	NTC	SYBR	None				38.0006									FALSE	0.071608	TRUE	3	35	1	62.5859	70.4079	81.011		N	Y
E1	Aveloz	TCEA1	UNKNOWN	SYBR	None	1.24642	1.16779	1.33035	20.2561	20.2514	0.0247472		2.93197	0.0338612			-0.317791	FALSE	0.071608	TRUE	3	16	1	77.1869				N	N
E2	Aveloz	TCEA1	UNKNOWN	SYBR	None	1.24642	1.16779	1.33035	20.2734	20.2514	0.0247472		2.93197	0.0338612			-0.317791	FALSE	0.071608	TRUE	3	16	1	77.5346				N	N
E3	Aveloz	TCEA1	UNKNOWN	SYBR	None	1.24642	1.16779	1.33035	20.2246	20.2514	0.0247472		2.93197	0.0338612			-0.317791	FALSE	0.071608	TRUE	3	16	1	77.7084				N	N
E4	Controle	TCEA1	UNKNOWN	SYBR	None	1	0.975645	1.02496	19.2477	19.2544	0.00837875		3.24976	0.012812			0	FALSE	0.071608	TRUE	3	15	1	77.8822				N	N
E5	Controle	TCEA1	UNKNOWN	SYBR	None	1	0.975645	1.02496	19.2638	19.2544	0.00837875		3.24976	0.012812			0	FALSE	0.071608	TRUE	3	16	1	77.8822				N	N
E6	Controle	TCEA1	UNKNOWN	SYBR	None	1	0.975645	1.02496	19.2516	19.2544	0.00837875		3.24976	0.012812			0	FALSE	0.071608	TRUE	3	16	1	77.8822				N	N
E7	Etanol	TCEA1	UNKNOWN	SYBR	None	1.1765	1.09534	1.26368	19.1917	19.222	0.0277238		3.01525	0.0371436			-0.234506	FALSE	0.071608	TRUE	3	15	1	77.7084				N	N
E8	Etanol	TCEA1	UNKNOWN	SYBR	None	1.1765	1.09534	1.26368	19.2281	19.222	0.0277238		3.01525	0.0371436			-0.234506	FALSE	0.071608	TRUE	3	16	1	77.8822				N	N
E9	Etanol	TCEA1	UNKNOWN	SYBR	None	1.1765	1.09534	1.26368	19.2461	19.222	0.0277238		3.01525	0.0371436			-0.234506	FALSE	0.071608	TRUE	3	16	1	78.056				N	N
E12		TCEA1	NTC	SYBR	None				38.0933									FALSE	0.071608	TRUE	3	35	1	72.3199				N	N
F1	Aveloz	GAPDH	UNKNOWN	SYBR	None				17.3274	17.3194	0.0531725							FALSE	0.071608	TRUE	3	14	1	78.2298				N	N
F2	Aveloz	GAPDH	UNKNOWN	SYBR	None				17.3681	17.3194	0.0531725							FALSE	0.071608	TRUE	3	14	1	78.4037				N	N
F3	Aveloz	GAPDH	UNKNOWN	SYBR	None				17.2627	17.3194	0.0531725							FALSE	0.071608	TRUE	3	13	1	78.5775				N	N
F4	Controle	GAPDH	UNKNOWN	SYBR	None				15.9936	16.0046	0.0205485							FALSE	0.071608	TRUE	3	12	1	78.7513				N	N
F5	Controle	GAPDH	UNKNOWN	SYBR	None				15.9919	16.0046	0.0205485							FALSE	0.071608	TRUE	3	12	1	78.7513				N	N
F6	Controle	GAPDH	UNKNOWN	SYBR	None				16.0283	16.0046	0.0205485							FALSE	0.071608	TRUE	3	13	1	78.9251				N	N
F7	Etanol	GAPDH	UNKNOWN	SYBR	None				16.1561	16.2067	0.0580545							FALSE	0.071608	TRUE	3	12	1	78.7513				N	N
F8	Etanol	GAPDH	UNKNOWN	SYBR	None				16.194	16.2067	0.0580545							FALSE	0.071608	TRUE	3	12	1	78.9251				N	N
F9	Etanol	GAPDH	UNKNOWN	SYBR	None				16.2701	16.2067	0.0580545							FALSE	0.071608	TRUE	3	13	1	78.9251				N	N
F12		GAPDH	NTC	SYBR	None				39.1845									FALSE	0.071608	TRUE	3	35	1	72.1461	62.412			N	Y
G1	Aveloz	ACTB	UNKNOWN	SYBR	None	0.719206	0.662329	0.780968	17.1825	17.2282	0.0516779		-0.0912139	0.0428094			0.475523	FALSE	0.071608	TRUE	3	13	1	75.4487				N	N
G2	Aveloz	ACTB	UNKNOWN	SYBR	None	0.719206	0.662329	0.780968	17.2178	17.2282	0.0516779		-0.0912139	0.0428094			0.475523	FALSE	0.071608	TRUE	3	13	1	75.4487				N	N
G3	Aveloz	ACTB	UNKNOWN	SYBR	None	0.719206	0.662329	0.780968	17.2842	17.2282	0.0516779		-0.0912139	0.0428094			0.475523	FALSE	0.071608	TRUE	3	14	1	75.6225				N	N
G4	Controle	ACTB	UNKNOWN	SYBR	None	1	0.971548	1.02929	15.4211	15.4379	0.0158946		-0.566737	0.0149986			0	FALSE	0.071608	TRUE	3	11	1	75.7963				N	N
G5	Controle	ACTB	UNKNOWN	SYBR	None	1	0.971548	1.02929	15.4528	15.4379	0.0158946		-0.566737	0.0149986			0	FALSE	0.071608	TRUE	3	12	1	75.9702				N	N
G6	Controle	ACTB	UNKNOWN	SYBR	None	1	0.971548	1.02929	15.4397	15.4379	0.0158946		-0.566737	0.0149986			0	FALSE	0.071608	TRUE	3	12	1	76.144				N	N
G7	Etanol	ACTB	UNKNOWN	SYBR	None	1.09392	1.02355	1.16912	15.523	15.5105	0.0144908		-0.69624	0.0345461			-0.129504	FALSE	0.071608	TRUE	3	12	1	75.9702				N	N
G8	Etanol	ACTB	UNKNOWN	SYBR	None	1.09392	1.02355	1.16912	15.5139	15.5105	0.0144908		-0.69624	0.0345461			-0.129504	FALSE	0.071608	TRUE	3	12	1	76.144				N	N
G9	Etanol	ACTB	UNKNOWN	SYBR	None	1.09392	1.02355	1.16912	15.4946	15.5105	0.0144908		-0.69624	0.0345461			-0.129504	FALSE	0.071608	TRUE	3	11	1	76.144				N	N
G12		ACTB	NTC	SYBR	None				35.8121									FALSE	0.071608	TRUE	3	32	1	74.9272				N	N
Analysis Type	Singleplex
Endogenous Control	GAPDH
RQ Min/Max Confidence Level	95.0
Reference Sample	Controle

## Sheet: Plan1
						CE=GAPDH
Well	Sample Name	Target Name		Cт	Cт Mean		CT CE		Delta Ct	ddCt	2-ddCt	LOG2	LOG3
A1	Aveloz	ANXA1		18.5314	18.5139		17.3194		1.19451	-1.38244	2.60709	1.38244	0.872222
A2	Aveloz	ANXA1		18.5472
A3	Aveloz	ANXA1		18.4631
A4	Controle	ANXA1		18.5989	18.5816		16.0046		2.57695	0	1	0	0
A5	Controle	ANXA1		18.5623
A6	Controle	ANXA1		18.5834
A7	Etanol	ANXA1		18.5029	18.5096		16.2067		2.30283	-0.274115	1.20925	0.274115	0.172947
A8	Etanol	ANXA1		18.519
A9	Etanol	ANXA1		18.5067
A12
B1	Aveloz	NGFRAP1		18.5565	18.5327		17.3194		1.21333	-0.808083	1.75088	0.808083	0.509843
B2	Aveloz	NGFRAP1		18.5994
B3	Aveloz	NGFRAP1		18.4422
B4	Controle	NGFRAP1		18.0873	18.026		16.0046		2.02142	0	1	0	0
B5	Controle	NGFRAP1		18.0063
B6	Controle	NGFRAP1		17.9846
B7	Etanol	NGFRAP1		18.2718	18.2648		16.2067		2.05805	0.0366306	0.974929	-0.0366306	-0.0231114
B8	Etanol	NGFRAP1		18.1973
B9	Etanol	NGFRAP1		18.3252
B12
C1	Aveloz	CD55		15.9136	15.8594		17.3194		-1.45996	-1.70752	3.26599	1.70752	1.07732
C2	Aveloz	CD55		15.8383
C3	Aveloz	CD55		15.8265
C4	Controle	CD55		16.2973	16.2522		16.0046		0.247562	0	1	0	0
C5	Controle	CD55		16.251
C6	Controle	CD55		16.2083
C7	Etanol	CD55		16.151	16.1905		16.2067		-0.0161972	-0.26376	1.2006	0.26376	0.166414
C8	Etanol	CD55		16.206
C9	Etanol	CD55		16.2146
C12
D1	Aveloz	ITPR1		26.098	26.1351		17.3194		8.81573	2.18018	0.220649	-2.18018	-1.37554
D2	Aveloz	ITPR1		26.1927
D3	Aveloz	ITPR1		26.1146
D4	Controle	ITPR1		22.5509	22.6402		16.0046		6.63556	0	1	0	0
D5	Controle	ITPR1		22.6004
D6	Controle	ITPR1		22.7693
D7	Etanol	ITPR1		23.2121	23.2418		16.2067		7.03506	0.399502	0.75812	-0.399502	-0.252058
D8	Etanol	ITPR1		23.3059
D9	Etanol	ITPR1		23.2074
D12
E1	Aveloz	TCEA1		20.2561	20.2514		17.3194		2.93197	-0.317793	1.24642	0.317793	0.200505
E2	Aveloz	TCEA1		20.2734
E3	Aveloz	TCEA1		20.2246
E4	Controle	TCEA1		19.2477	19.2544		16.0046		3.24976	0	1	0	0
E5	Controle	TCEA1		19.2638
E6	Controle	TCEA1		19.2516
E7	Etanol	TCEA1		19.1917	19.222		16.2067		3.01525	-0.234509	1.17651	0.234509	0.147958
E8	Etanol	TCEA1		19.2281
E9	Etanol	TCEA1		19.2461
E12
F1	Aveloz	GAPDH		17.3274	17.3194
F2	Aveloz	GAPDH		17.3681
F3	Aveloz	GAPDH		17.2627
F4	Controle	GAPDH		15.9936	16.0046
F5	Controle	GAPDH		15.9919
F6	Controle	GAPDH		16.0283
F7	Etanol	GAPDH		16.1561	16.2067
F8	Etanol	GAPDH		16.194
F9	Etanol	GAPDH		16.2701
F12
G1	Aveloz	ACTB		17.1825	17.2282
G2	Aveloz	ACTB		17.2178
G3	Aveloz	ACTB		17.2842
G4	Controle	ACTB		15.4211	15.4379
G5	Controle	ACTB		15.4528
G6	Controle	ACTB		15.4397
G7	Etanol	ACTB		15.523	15.5105
G8	Etanol	ACTB		15.5139
G9	Etanol	ACTB		15.4946
G12

## Sheet: Plan2
						CE=ACTB
Well	Sample Name	Target Name		Cт	Cт Mean		CT CE		Delta Ct	ddCt	2-ddCt	LOG2	LOG3
A1	Aveloz	ANXA1		18.5314	18.5139		17.2282		1.28572	-1.85796	3.62495	1.85796	1.17224
A2	Aveloz	ANXA1		18.5472
A3	Aveloz	ANXA1		18.4631
A4	Controle	ANXA1		18.5989	18.5816		15.4379		3.14368	0	1	0	0
A5	Controle	ANXA1		18.5623
A6	Controle	ANXA1		18.5834
A7	Etanol	ANXA1		18.5029	18.5096		15.5105		2.99907	-0.14461	1.10543	0.14461	0.091239
A8	Etanol	ANXA1		18.519
A9	Etanol	ANXA1		18.5067
A12
B1	Aveloz	NGFRAP1		18.5565	18.5327		17.2282		1.30455	-1.2836	2.43446	1.2836	0.809864
B2	Aveloz	NGFRAP1		18.5994
B3	Aveloz	NGFRAP1		18.4422
B4	Controle	NGFRAP1		18.0873	18.026		15.4379		2.58815	0	1	0	0
B5	Controle	NGFRAP1		18.0063
B6	Controle	NGFRAP1		17.9846
B7	Etanol	NGFRAP1		18.2718	18.2648		15.5105		2.75429	0.166135	0.891227	-0.166135	-0.104819
B8	Etanol	NGFRAP1		18.1973
B9	Etanol	NGFRAP1		18.3252
B12
C1	Aveloz	CD55		15.9136	15.8594		17.2282		-1.36874	-2.18304	4.54109	2.18304	1.37734
C2	Aveloz	CD55		15.8383
C3	Aveloz	CD55		15.8265
C4	Controle	CD55		16.2973	16.2522		15.4379		0.814299	0	1	0	0
C5	Controle	CD55		16.251
C6	Controle	CD55		16.2083
C7	Etanol	CD55		16.151	16.1905		15.5105		0.680043	-0.134255	1.09753	0.134255	0.0847057
C8	Etanol	CD55		16.206
C9	Etanol	CD55		16.2146
C12
D1	Aveloz	ITPR1		26.098	26.1351		17.2282		8.90695	1.70466	0.306794	-1.70466	-1.07552
D2	Aveloz	ITPR1		26.1927
D3	Aveloz	ITPR1		26.1146
D4	Controle	ITPR1		22.5509	22.6402		15.4379		7.20229	0	1	0	0
D5	Controle	ITPR1		22.6004
D6	Controle	ITPR1		22.7693
D7	Etanol	ITPR1		23.2121	23.2418		15.5105		7.7313	0.529006	0.693032	-0.529006	-0.333766
D8	Etanol	ITPR1		23.3059
D9	Etanol	ITPR1		23.2074
D12
E1	Aveloz	TCEA1		20.2561	20.2514		17.2282		3.02318	-0.793314	1.73305	0.793314	0.500525
E2	Aveloz	TCEA1		20.2734
E3	Aveloz	TCEA1		20.2246
E4	Controle	TCEA1		19.2477	19.2544		15.4379		3.8165	0	1	0	0
E5	Controle	TCEA1		19.2638
E6	Controle	TCEA1		19.2516
E7	Etanol	TCEA1		19.1917	19.222		15.5105		3.71149	-0.105004	1.0755	0.105004	0.0662503
E8	Etanol	TCEA1		19.2281
E9	Etanol	TCEA1		19.2461
E12
F1	Aveloz	GAPDH		17.3274	17.3194
F2	Aveloz	GAPDH		17.3681
F3	Aveloz	GAPDH		17.2627
F4	Controle	GAPDH		15.9936	16.0046
F5	Controle	GAPDH		15.9919
F6	Controle	GAPDH		16.0283
F7	Etanol	GAPDH		16.1561	16.2067
F8	Etanol	GAPDH		16.194
F9	Etanol	GAPDH		16.2701
F12
G1	Aveloz	ACTB		17.1825	17.2282
G2	Aveloz	ACTB		17.2178
G3	Aveloz	ACTB		17.2842
G4	Controle	ACTB		15.4211	15.4379
G5	Controle	ACTB		15.4528
G6	Controle	ACTB		15.4397
G7	Etanol	ACTB		15.523	15.5105
G8	Etanol	ACTB		15.5139
G9	Etanol	ACTB		15.4946
